# Supplementary material
Source: Springer Nature journal article supplement (https://www.springermedizin.de/resource/supplementary/12936_2009_1131_MOESM2_ESM.pdf/9549944)

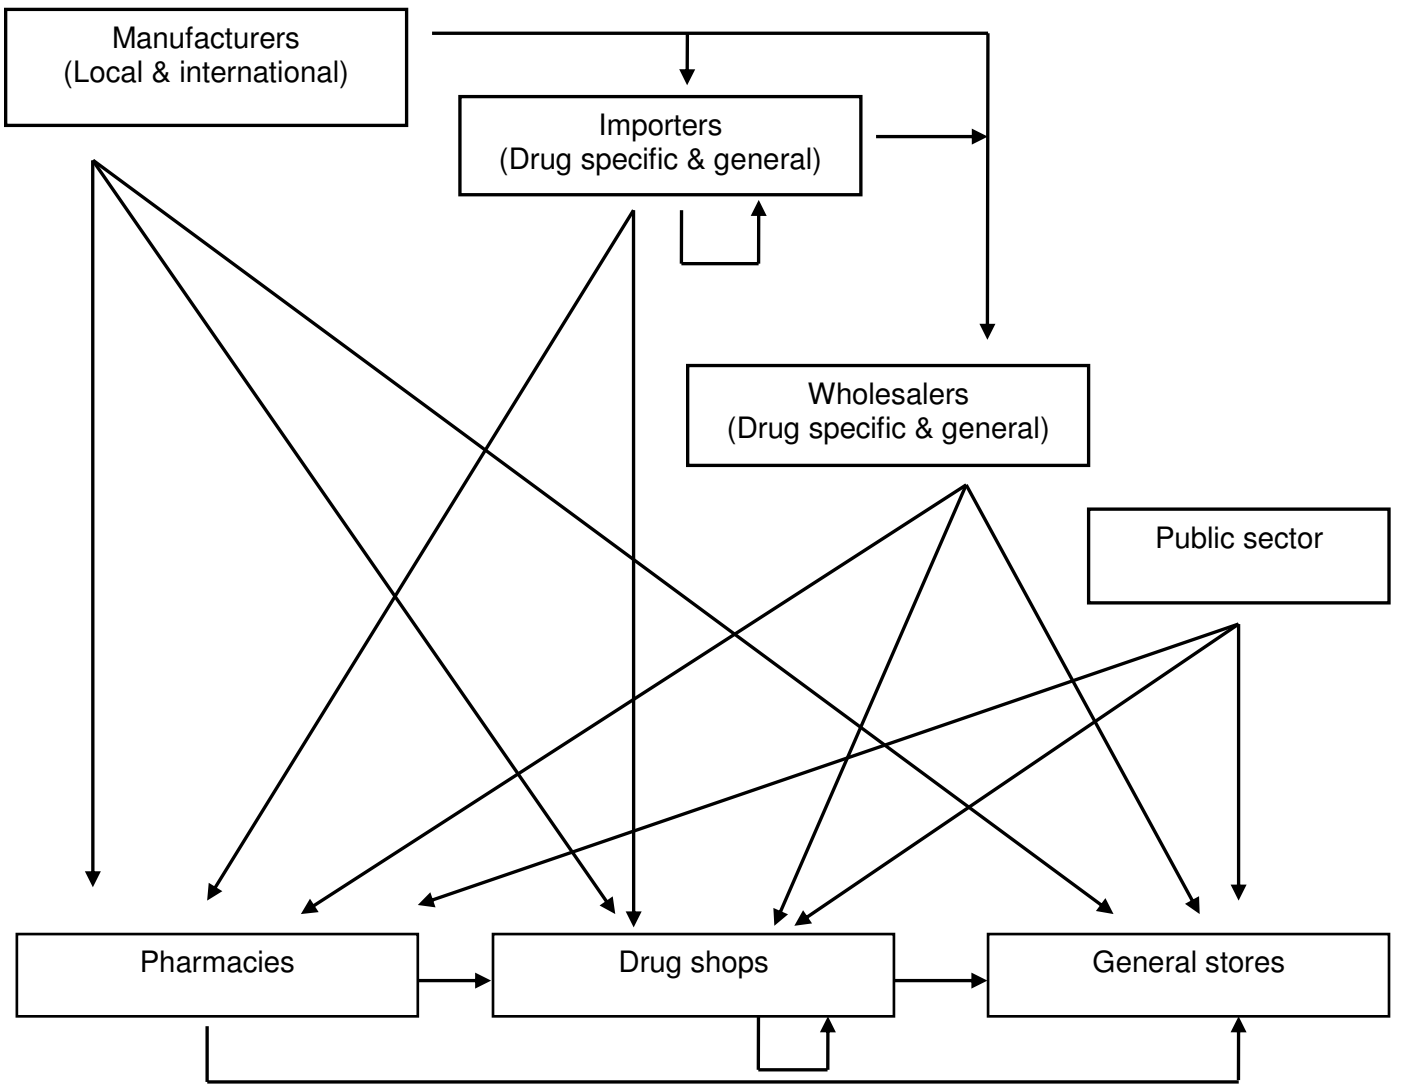

Supplement: MOESM2 [file 9549944]
